# Supplementary material for: Analysis of the Serum Profile of Cytokines Involved in the T-Helper Cell Type 17 Immune Response Pathway in Atopic Children with Food Allergy
Source: MDPI journal article supplement (doi:10.3390/ijerph19137877), 2022-06-27
Supplement: s1 [file s1]

## Supplementary Materials:

**Table S1.** Concentration values of nine cytokines in the allergy (1) and control (0) groups. The numerical variables are given in pg/ml.

| Cytokine         | ALLERGY GROUP (1) |          |          | CONTROL GROUP (0) |          |          |
|------------------|-------------------|----------|----------|-------------------|----------|----------|
|                  | Median            | Mean     | SD       | Median            | Mean     | SD       |
| <i>IL-1beta</i>  | 0,5136            | 0,4811   | 0,1160   | 0,4265            | 0,4184   | 0,0944   |
| <i>IL-4</i>      | 2,0702            | 2,9160   | 3,5823   | 1,5896            | 1,7493   | 2,0016   |
| <i>IL-17A</i>    | 15,4744           | 15,3561  | 4,0978   | 15,0220           | 14,8519  | 3,1972   |
| <i>IL-22</i>     | 94,7669           | 95,4454  | 23,8941  | 88,8639           | 90,4316  | 15,7027  |
| <i>IL-23</i>     | 42,4421           | 70,4735  | 79,0737  | 32,7100           | 62,5360  | 70,2685  |
| <i>IL-25</i>     | 12,4906           | 12,7253  | 2,4403   | 12,4906           | 11,9548  | 2,3814   |
| <i>IL-31</i>     | 344,0335          | 295,6018 | 217,0729 | 294,2489          | 230,7415 | 200,8768 |
| <i>sCD40L</i>    | 88,2887           | 175,2647 | 278,9027 | 92,7544           | 147,5596 | 183,6186 |
| <i>TNF-alpha</i> | 0,0000            | 5,1769   | 11,8366  | 0,0000            | 2,2746   | 3,5073   |

**Figure S1.** Detailed comparison of serum cytokine concentrations between the allergy group (1) and

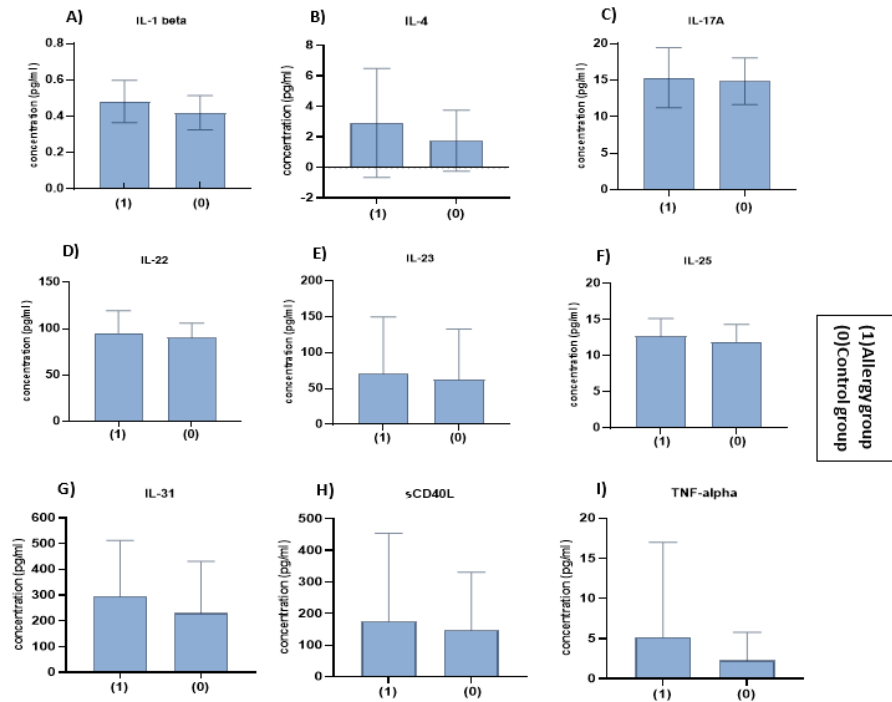

the control group (0).

**Table S2.** Concentration values of nine cytokines in the IgE-mediated allergy group (1), the delayed-type allergy group (2), and the control group (3). The numerical variables are given in pg/ml.

| Cytokine         | IGE-MEDIATED ALLERGY GROUP (1) |          |          | DELAYED-TYPE ALLERGY GROUP (2) |          |          | CONTROL GROUP (3) |          |          |
|------------------|--------------------------------|----------|----------|--------------------------------|----------|----------|-------------------|----------|----------|
|                  | Median                         | Mean     | SD       | Median                         | Mean     | SD       | Median            | Mean     | SD       |
| <i>IL-1beta</i>  | 0,5136                         | 0,4811   | 0,1160   | 0,4361                         | 0,4239   | 0,1007   | 0,4168            | 0,4151   | 0,0923   |
| <i>IL-4</i>      | 2,0702                         | 2,9160   | 3,5823   | 2,0702                         | 1,5396   | 1,4369   | 1,4210            | 1,8751   | 2,2940   |
| <i>IL-17A</i>    | 15,4744                        | 15,3561  | 4,0978   | 14,7437                        | 14,4977  | 3,1952   | 15,1139           | 15,0644  | 3,2450   |
| <i>IL-22</i>     | 94,7669                        | 95,4454  | 23,8941  | 85,7783                        | 88,9757  | 19,1280  | 91,8569           | 91,3052  | 13,6064  |
| <i>IL-23</i>     | 42,4421                        | 70,4735  | 79,0737  | 16,3665                        | 44,7748  | 57,6835  | 61,7873           | 73,1927  | 75,9425  |
| <i>IL-25</i>     | 12,4906                        | 12,7253  | 2,4403   | 12,4906                        | 11,7720  | 2,3634   | 12,4906           | 12,0644  | 2,4339   |
| <i>IL-31</i>     | 344,0335                       | 295,6018 | 217,0729 | 280,8525                       | 213,5733 | 213,2134 | 294,2489          | 241,0424 | 196,8707 |
| <i>sCD40L</i>    | 88,2887                        | 175,2647 | 278,9027 | 91,2690                        | 147,6732 | 209,8282 | 94,2398           | 147,4914 | 170,6026 |
| <i>TNF-alpha</i> | 0,0000                         | 5,1769   | 11,8366  | 0,0000                         | 2,1080   | 3,8241   | 0,0000            | 2,3746   | 3,3810   |

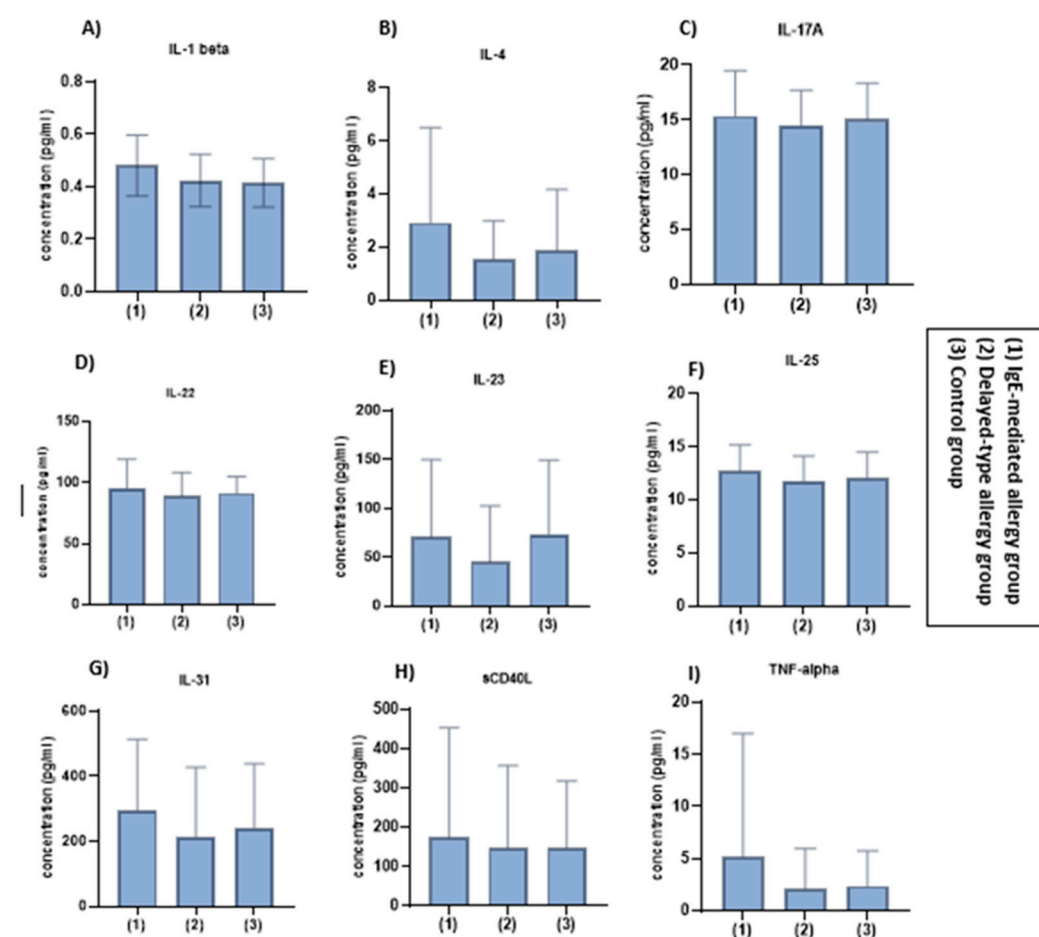

**Figure S2.** Detailed comparison of serum cytokine concentrations between the three studied groups: the IgE-mediated allergy group (1), the delayed-type allergy group (2), and the control group (3).
